# Supplementary material for: Benchmarking transcriptome deconvolution methods for estimating tissue‐ and cell‐type‐specific extracellular vesicle abundances
Source: PubMed Central journal article supplement — J Extracell Vesicles. 2024 Sep 25;13(9):e12511. doi: 10.1002/jev2.12511 (PMC11423344; doi:10.1002/jev2.12511), 2024-09-25

# Supplemental Figure S9

a Deconvolution of exoRbase cohort uEVs with 27-tissue signature matrix

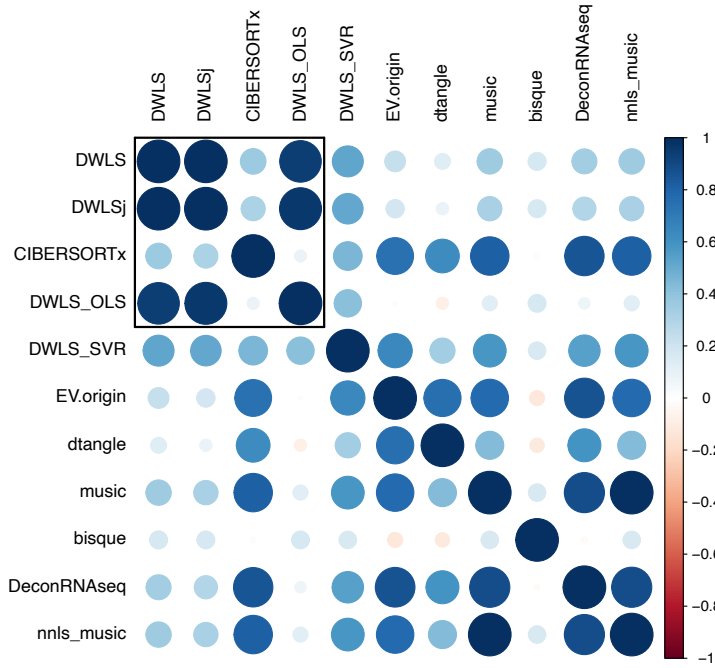

b Deconvolution of Dwiverdi cohort uEVs with 27-tissue signature matrix

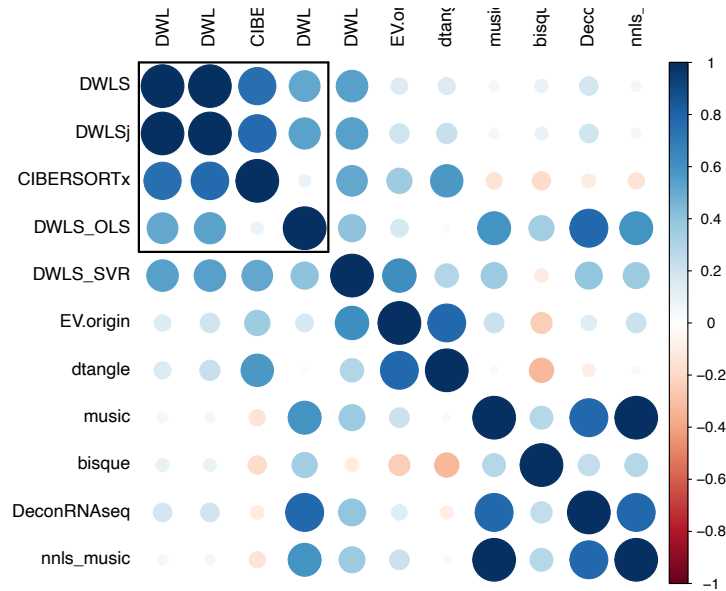

Supplement: JEV2-13-e12511-s014.pdf [file JEV2-13-e12511-s014.pdf]
