# Supplementary figures and images for: Benchmarking transcriptome deconvolution methods for estimating tissue‐ and cell‐type‐specific extracellular vesicle abundances
Source: PubMed Central journal article supplement — J Extracell Vesicles. 2024 Sep 25;13(9):e12511. doi: 10.1002/jev2.12511 (PMC11423344; doi:10.1002/jev2.12511), 2024-09-25

# Supplemental Figure S4

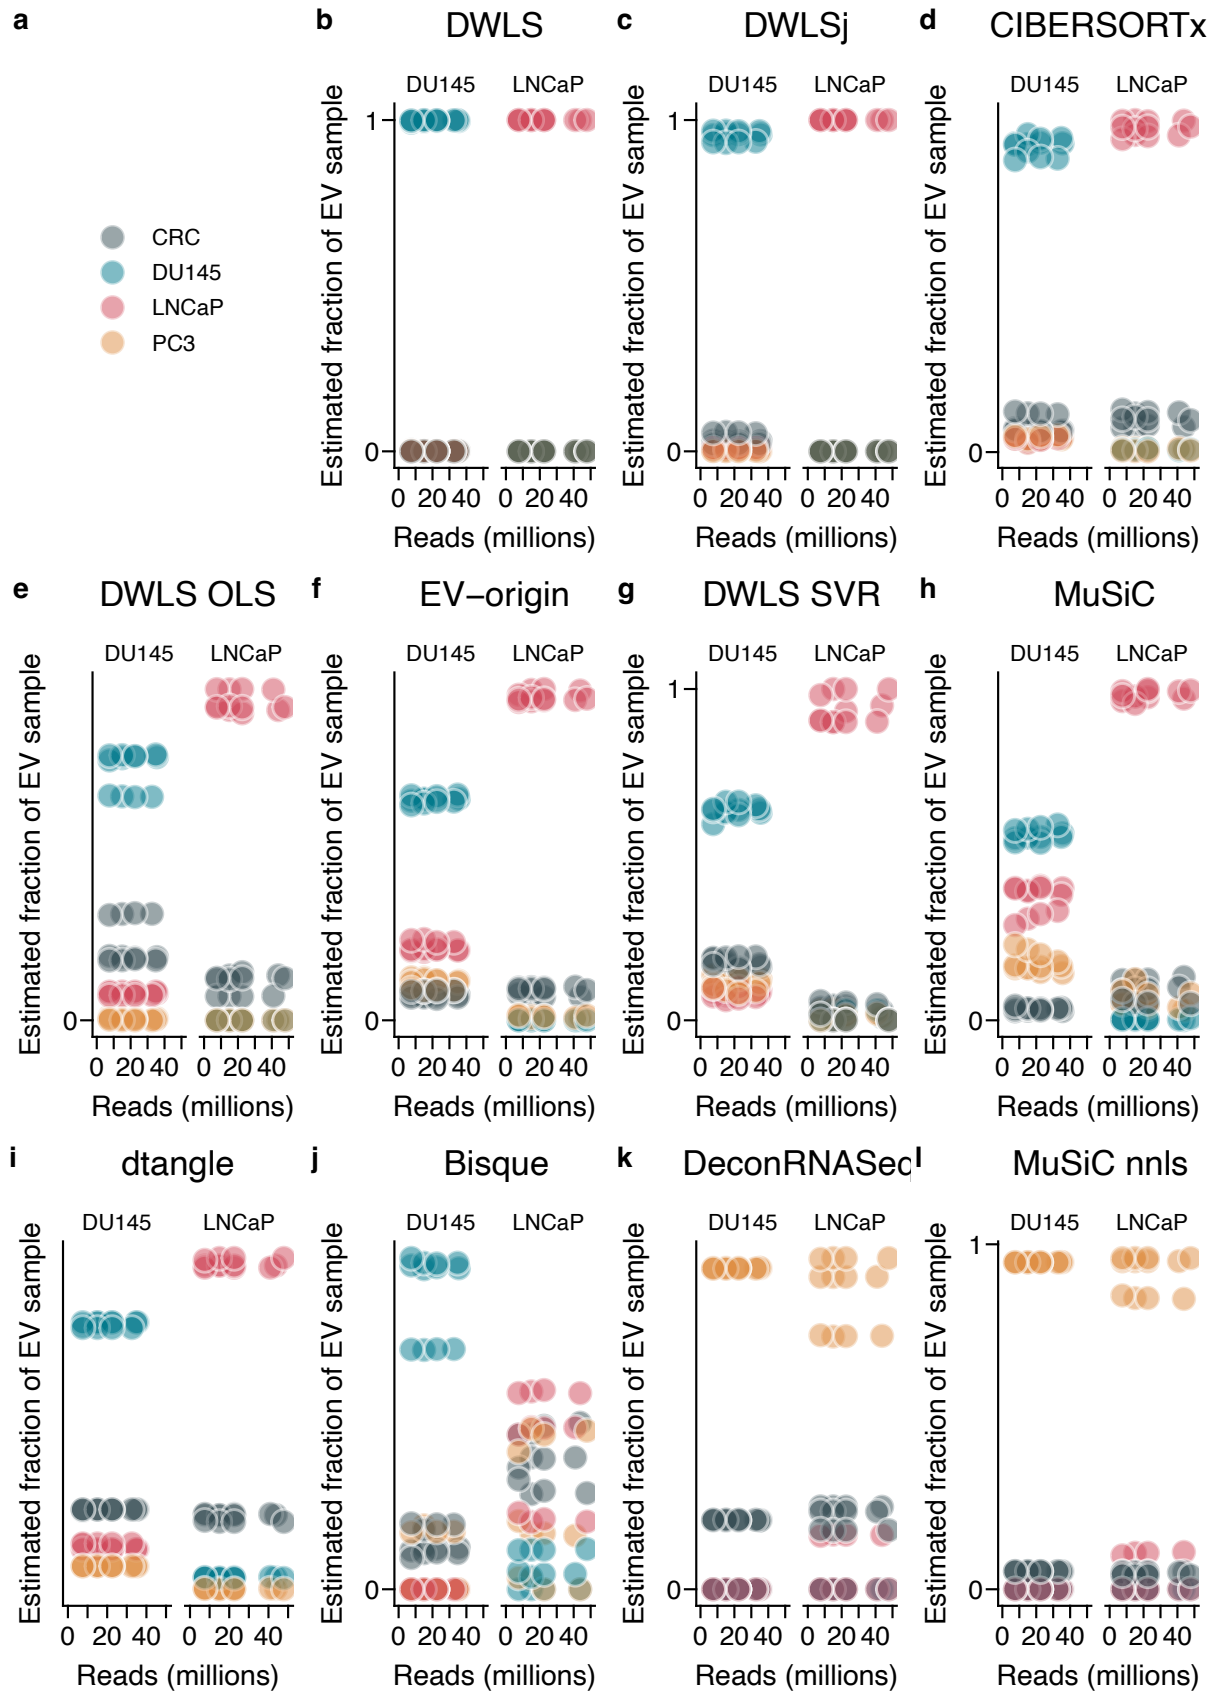

Supplement: JEV2-13-e12511-s001.pdf [file JEV2-13-e12511-s001.pdf]

# Supplemental Figure S10

a

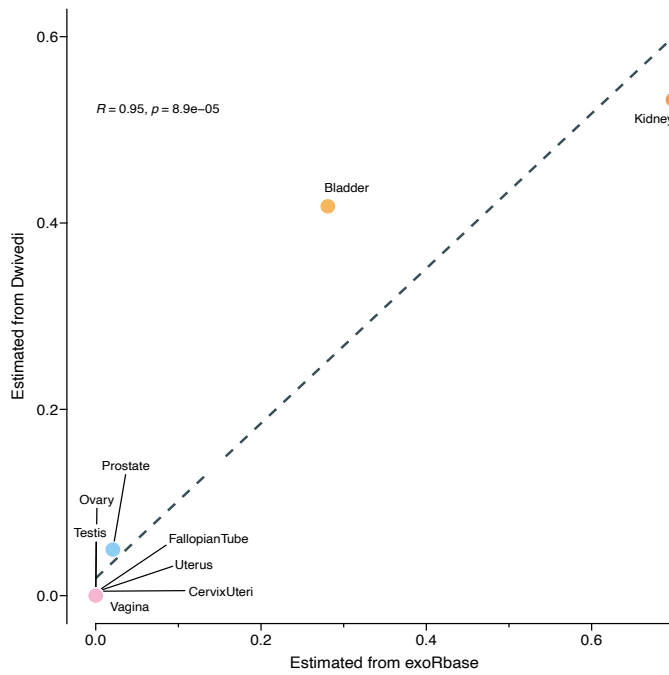

b

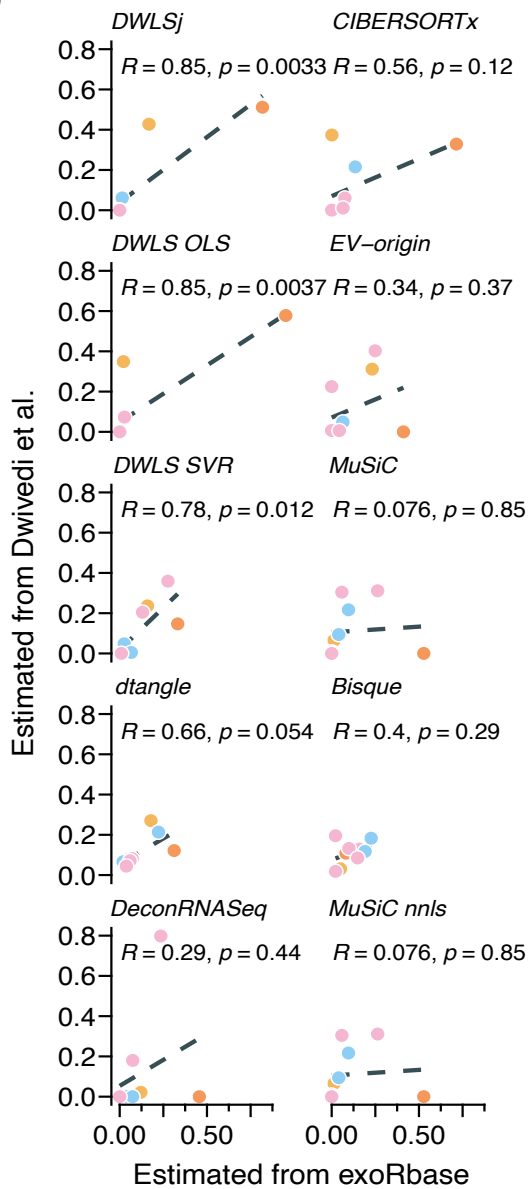

Supplement: JEV2-13-e12511-s003.pdf [file JEV2-13-e12511-s003.pdf]

# Supplemental Figure S7

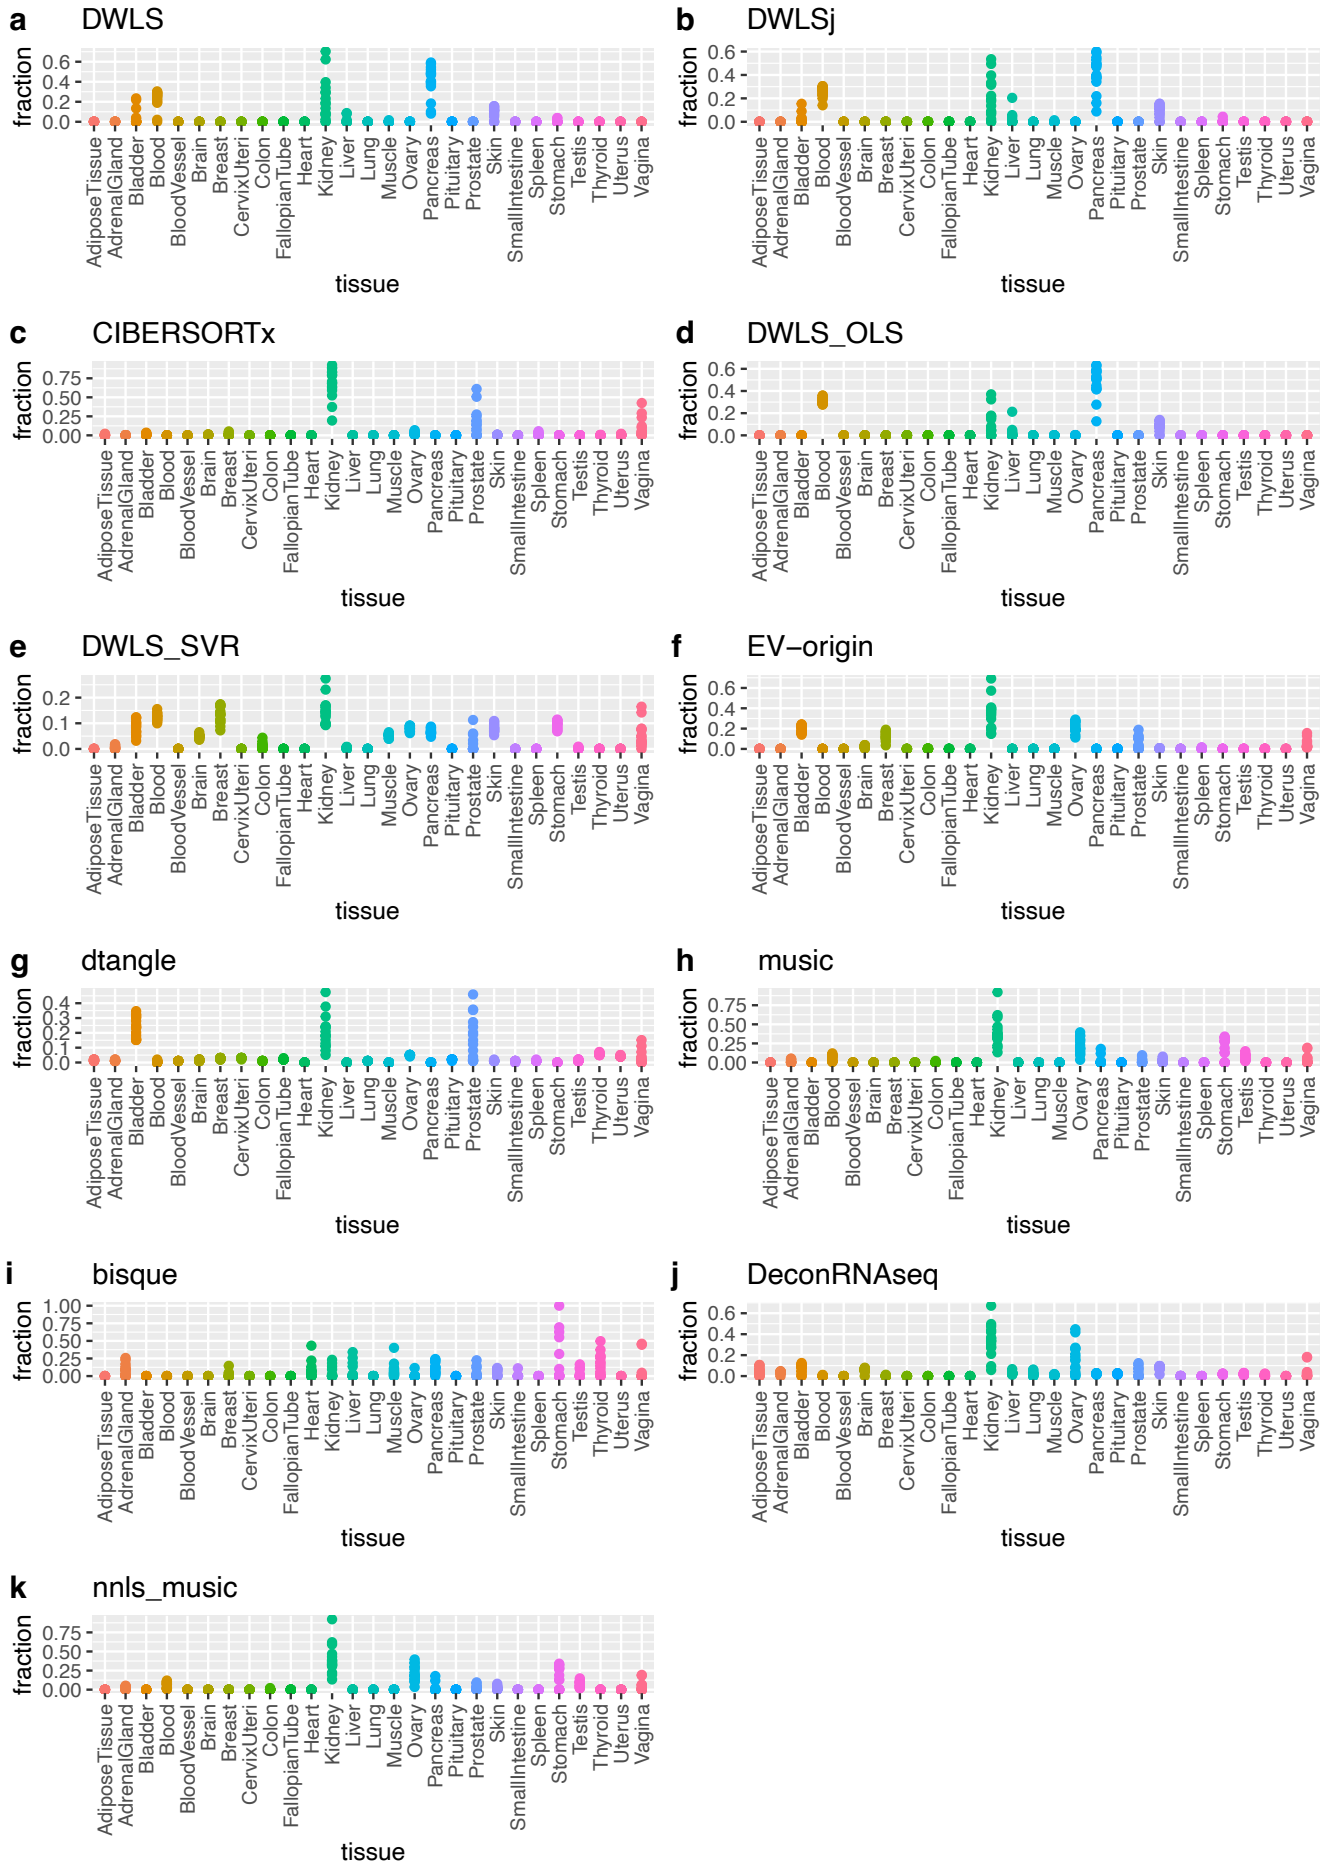

Supplement: JEV2-13-e12511-s004.pdf [file JEV2-13-e12511-s004.pdf]

# Supplemental Figure S11

a

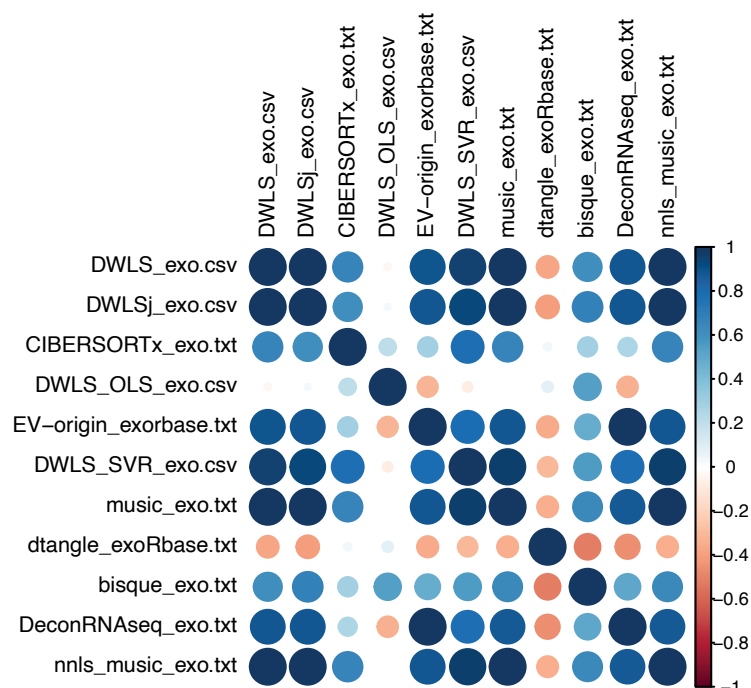

b

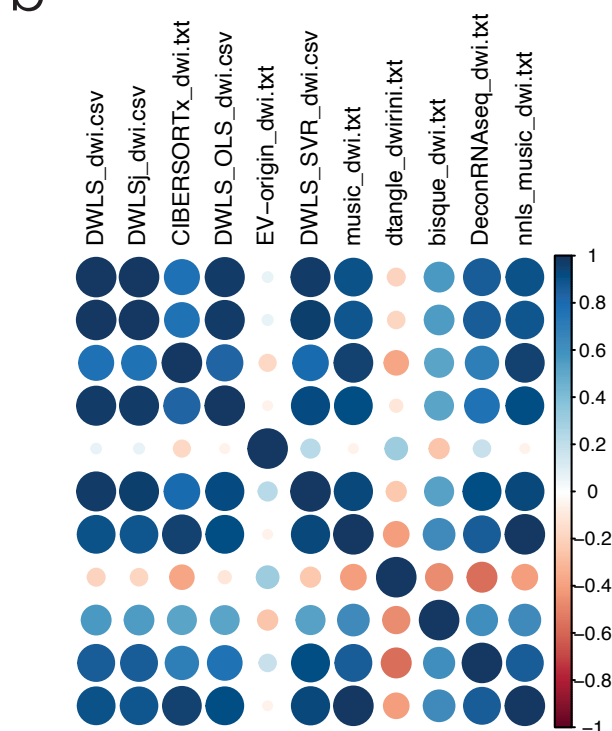

c

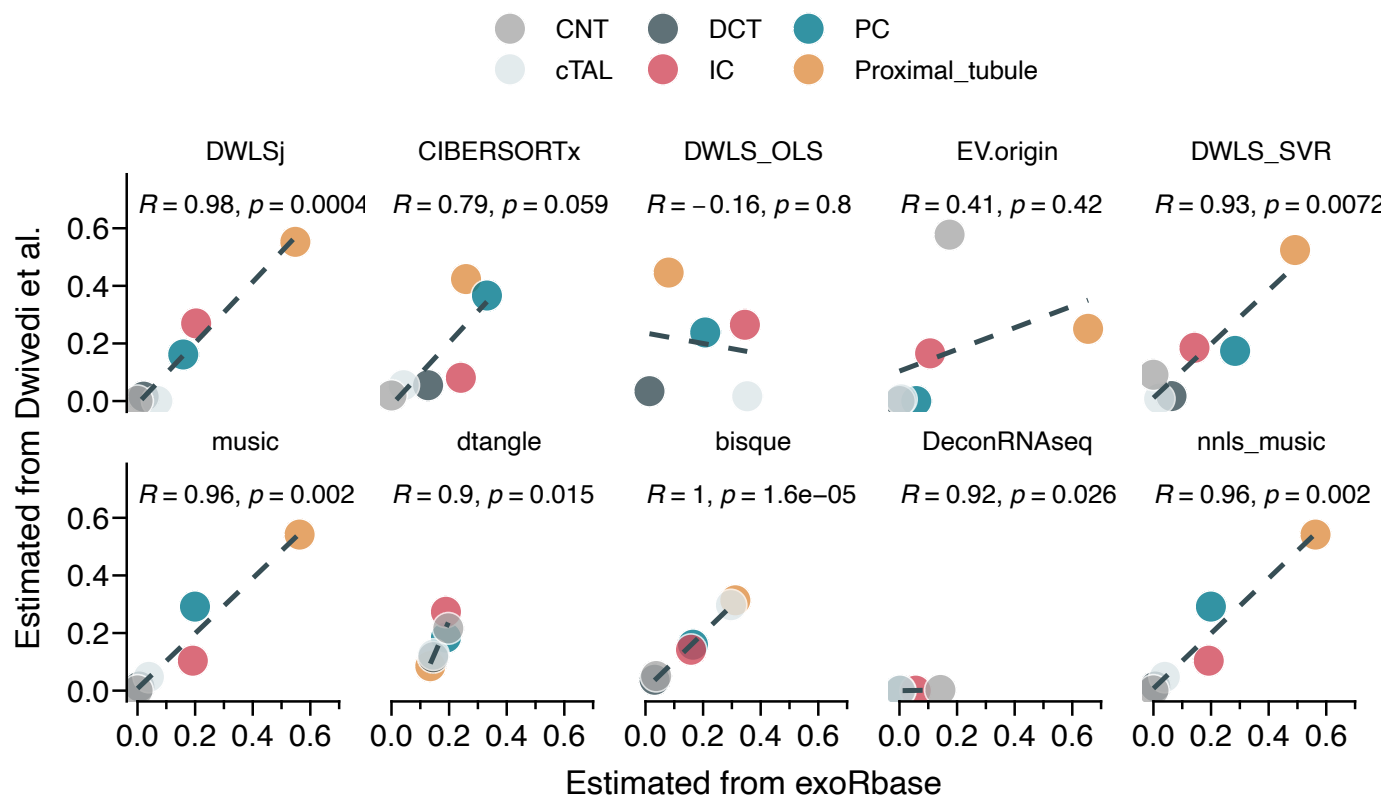

Supplement: JEV2-13-e12511-s005.pdf [file JEV2-13-e12511-s005.pdf]

# Supplemental Figure S6

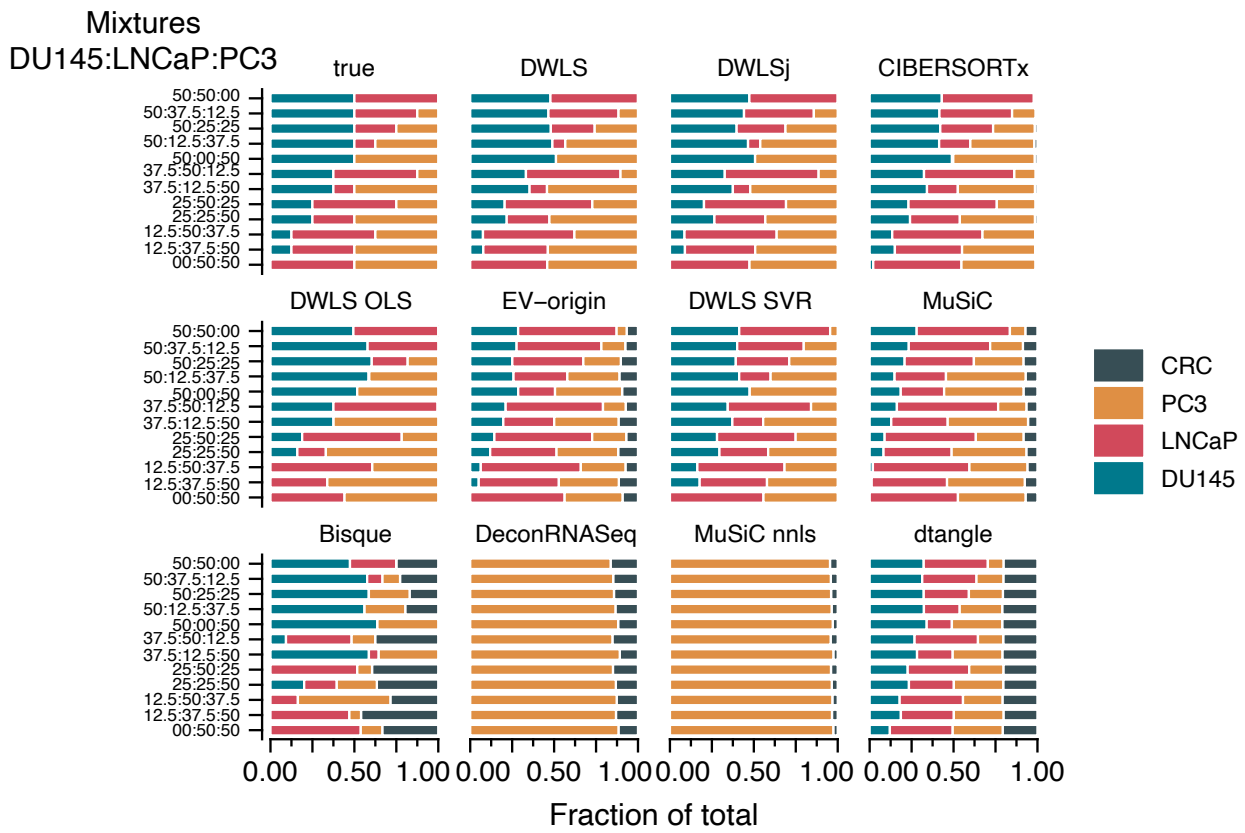

Supplement: JEV2-13-e12511-s006.pdf [file JEV2-13-e12511-s006.pdf]

# Supplemental Figure S3

a

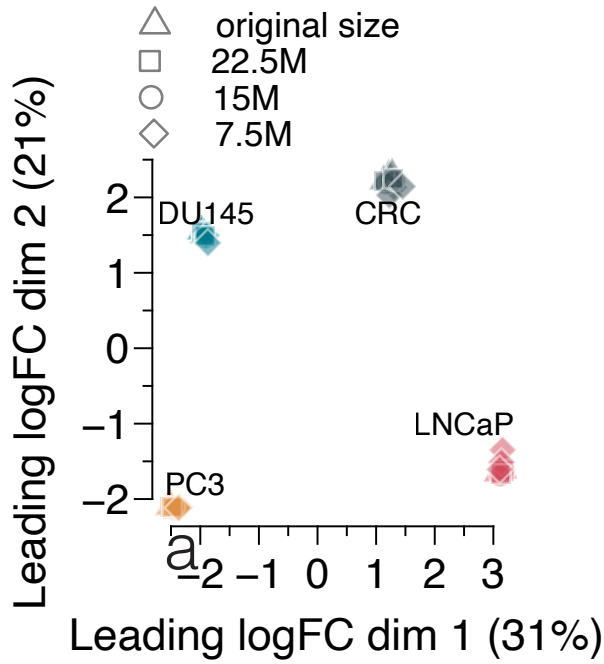

b

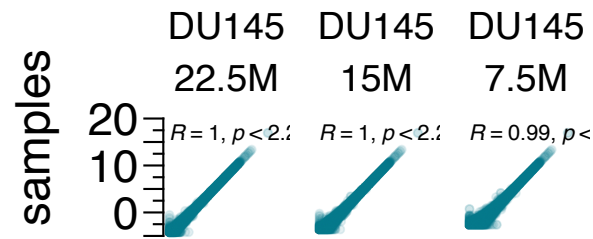

c

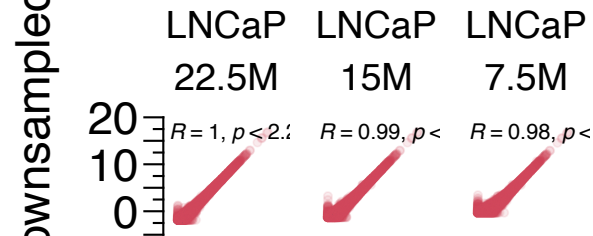

d

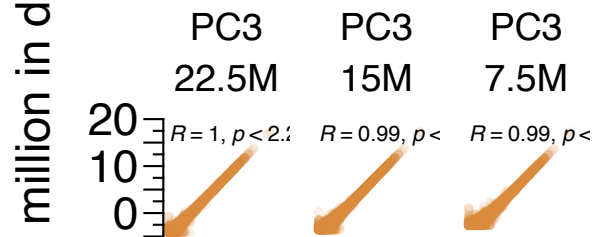

e

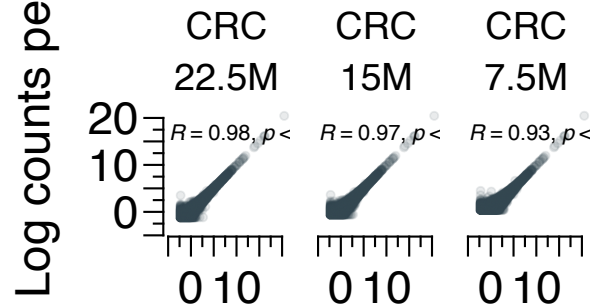

Log counts per million in original samples

Supplement: JEV2-13-e12511-s007.pdf [file JEV2-13-e12511-s007.pdf]

# Supplemental Figure S13

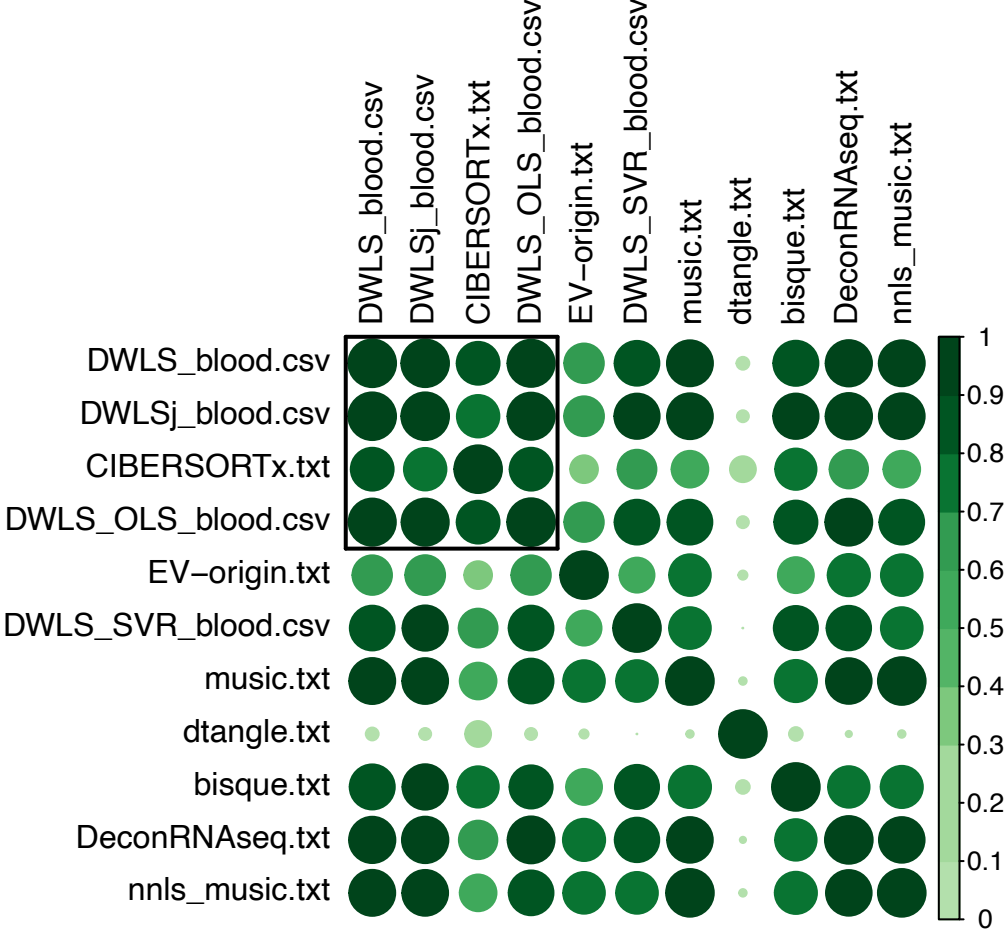

Supplement: JEV2-13-e12511-s009.pdf [file JEV2-13-e12511-s009.pdf]

# Supplemental Figure S2

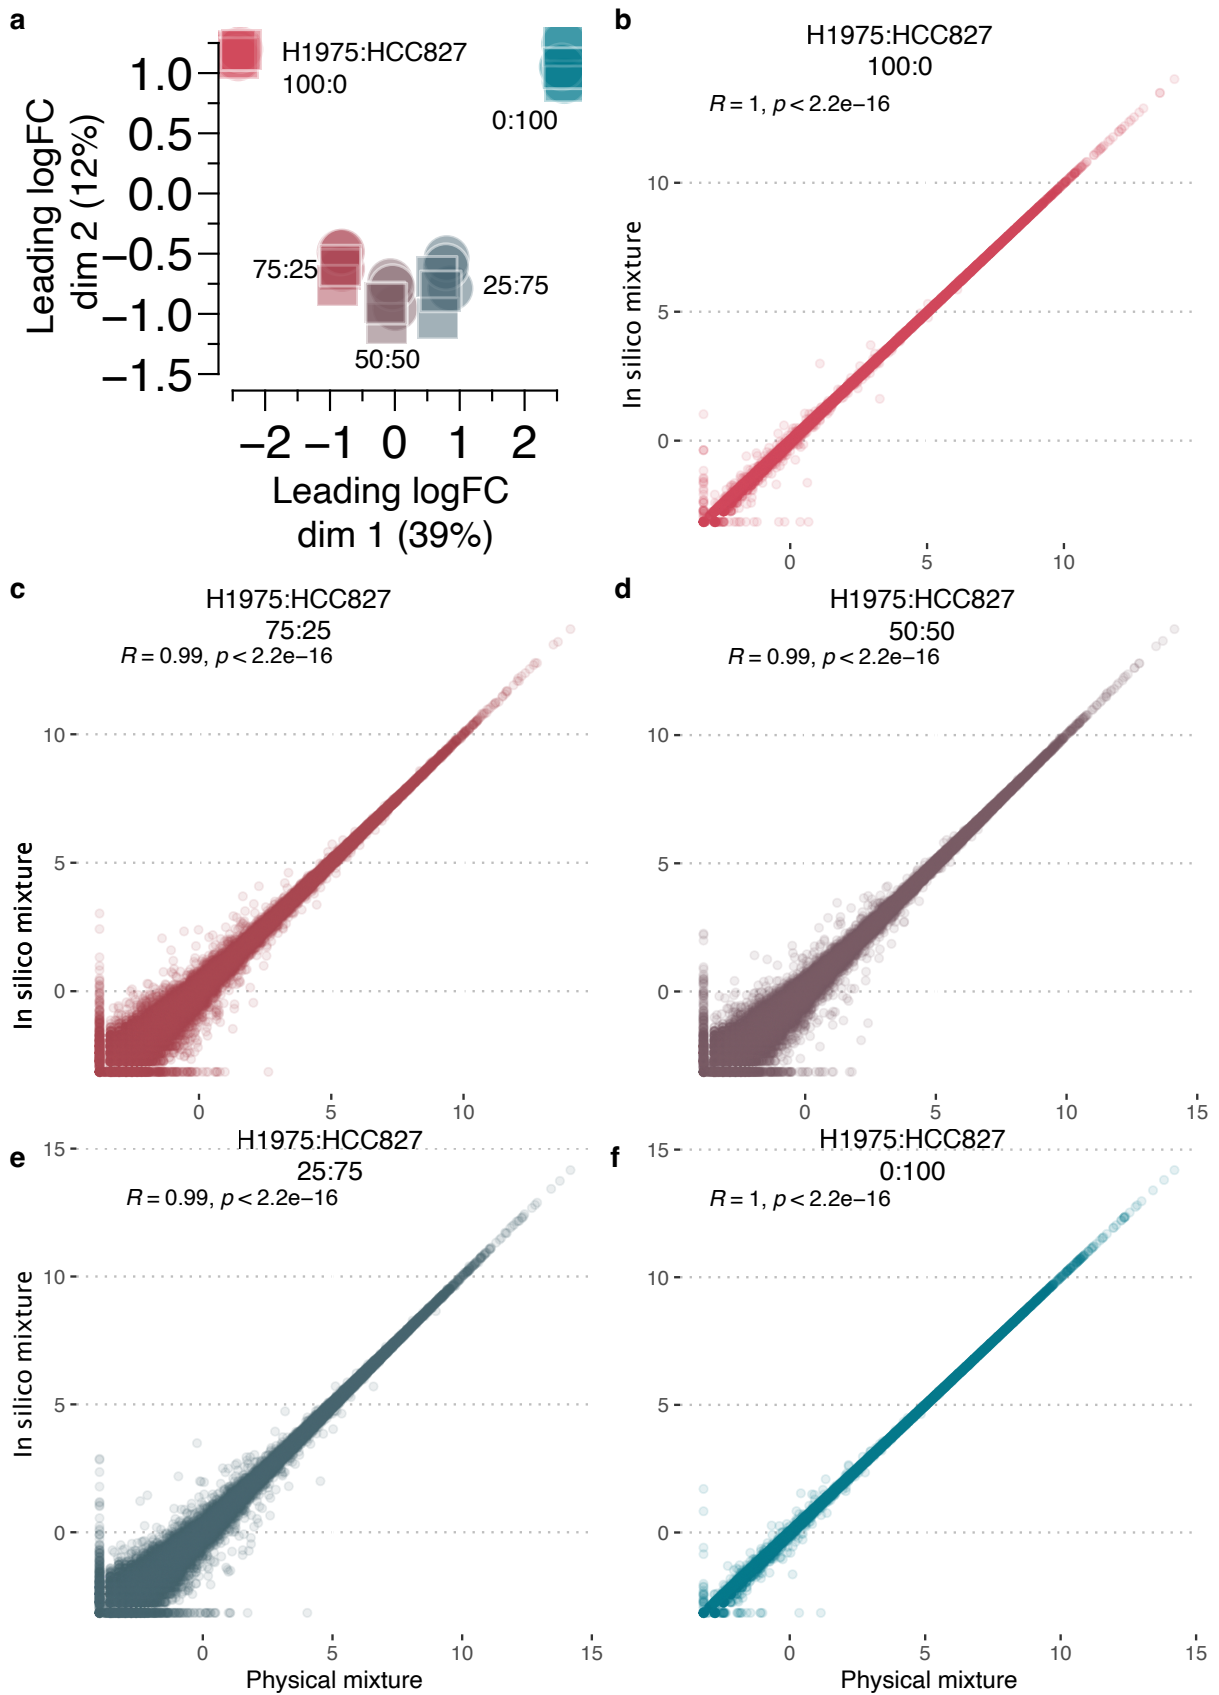

Supplement: JEV2-13-e12511-s010.pdf [file JEV2-13-e12511-s010.pdf]

# Supplemental Figure S5

a

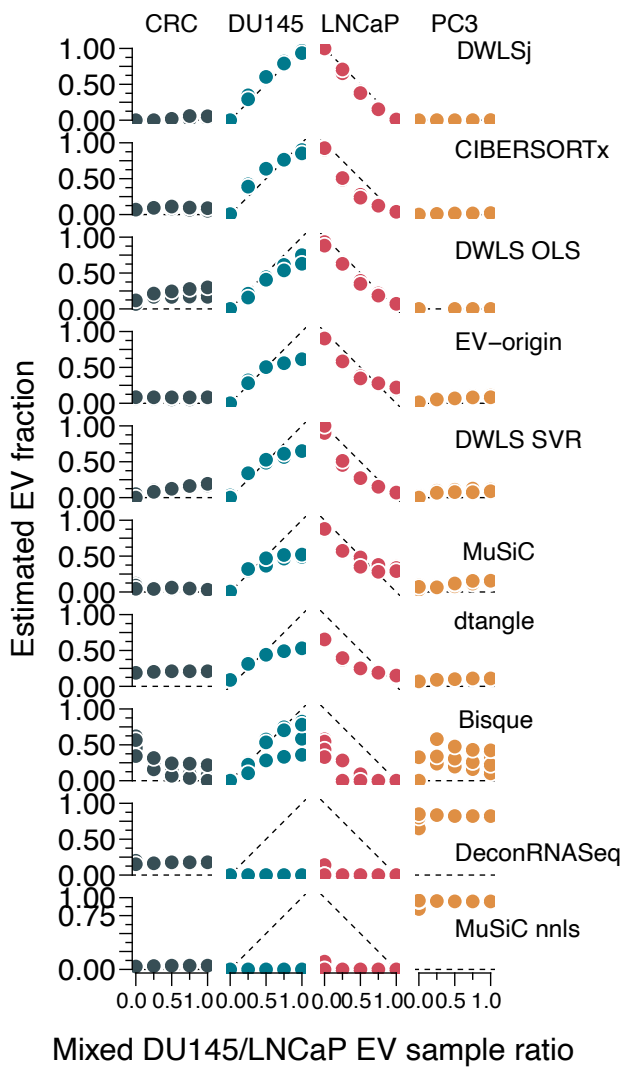

b

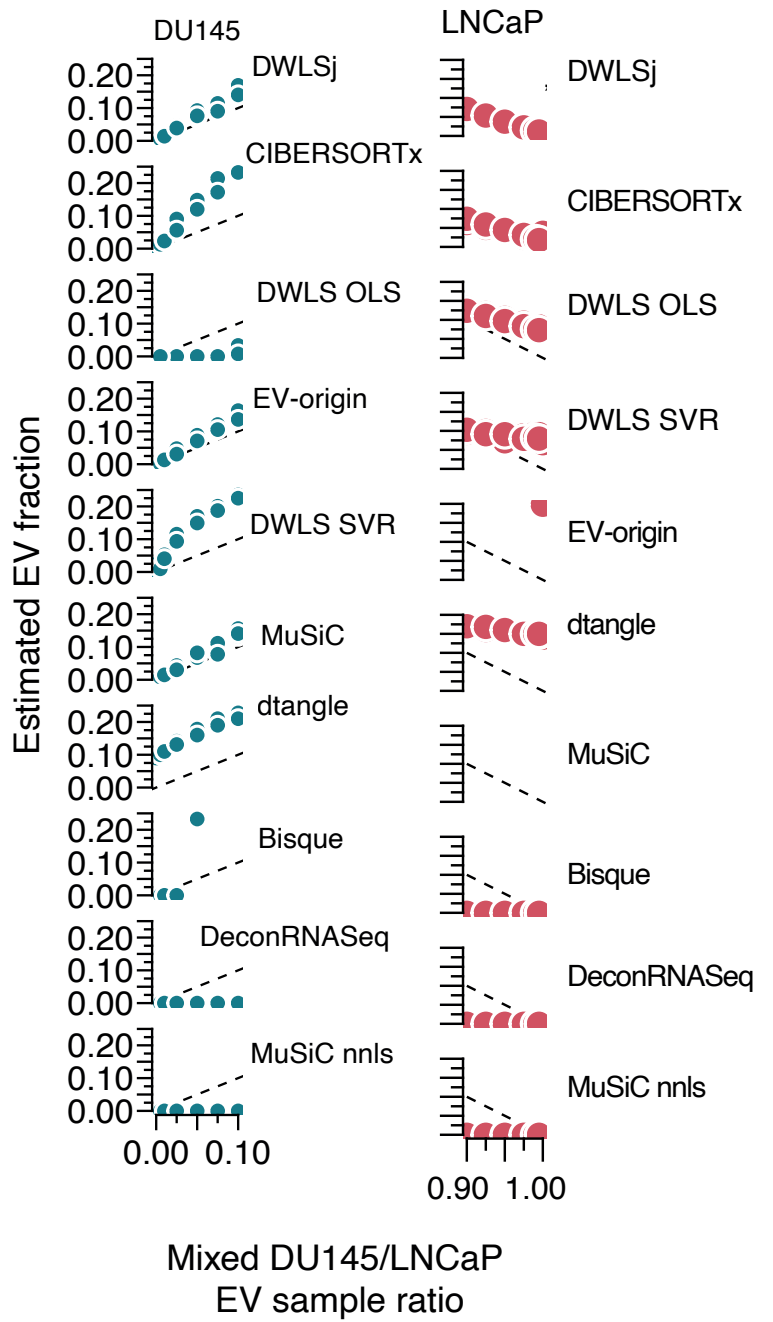

Supplement: JEV2-13-e12511-s011.pdf [file JEV2-13-e12511-s011.pdf]

# Supplemental Figure S8

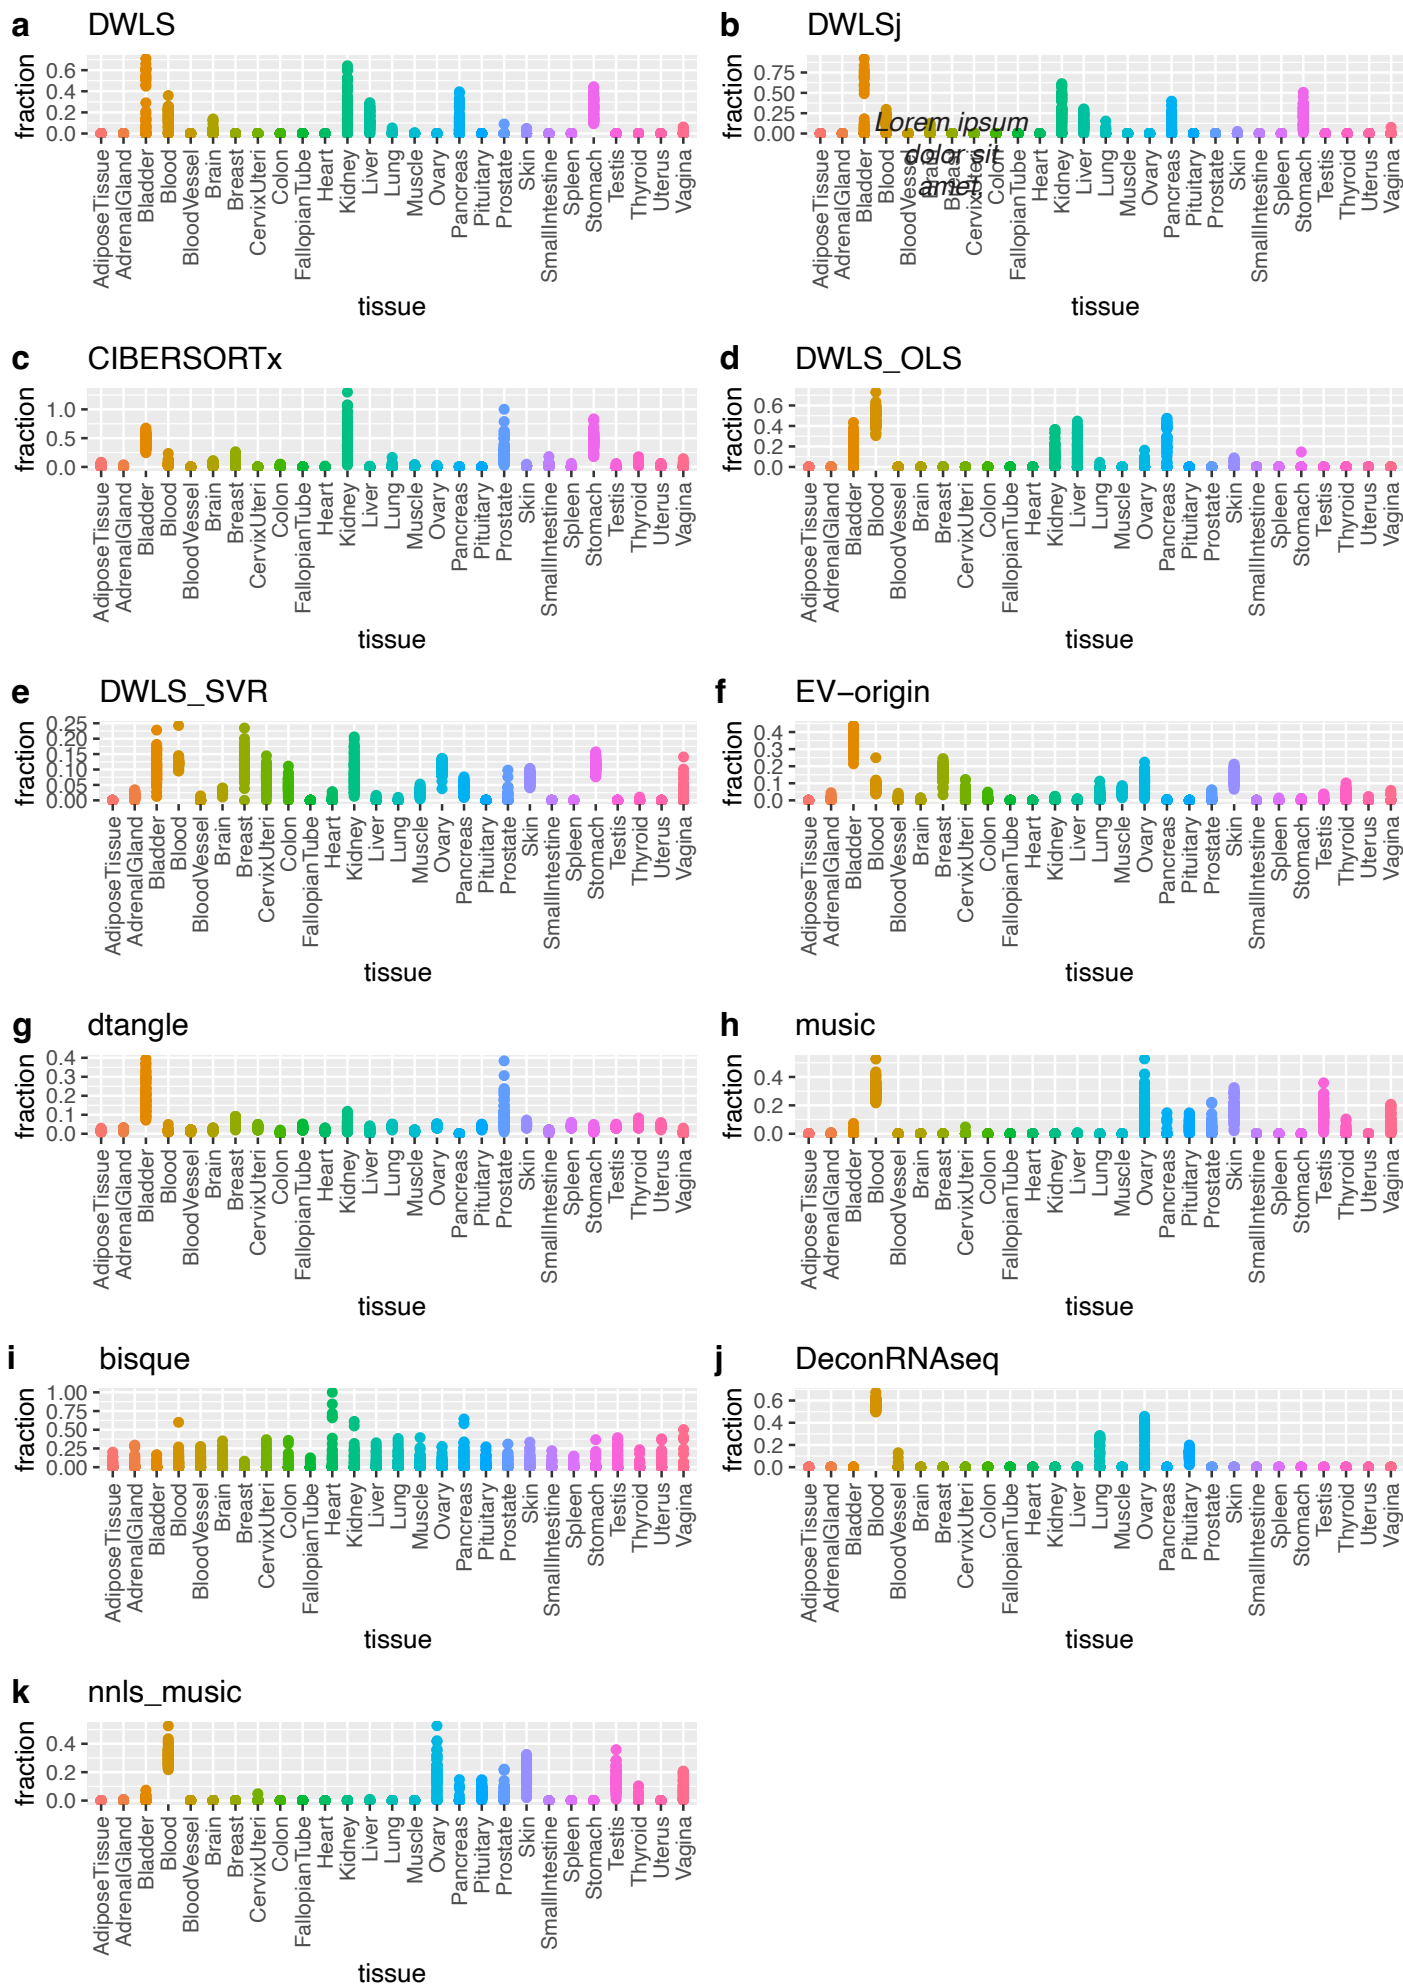

Supplement: JEV2-13-e12511-s013.pdf [file JEV2-13-e12511-s013.pdf]
